# Supplementary material for: Genetic Analysis of Cardiac Syncope-Related Genes in Korean Patients with Recurrent Neurally Mediated Syncope
Source: MDPI journal article supplement (doi:10.3390/jcdd9080265), 2022-08-14
Supplement: s1 [file s1]

## Additional file 1

**Figure S1:** Generation process of a candidate variant list using a four-step strategy.

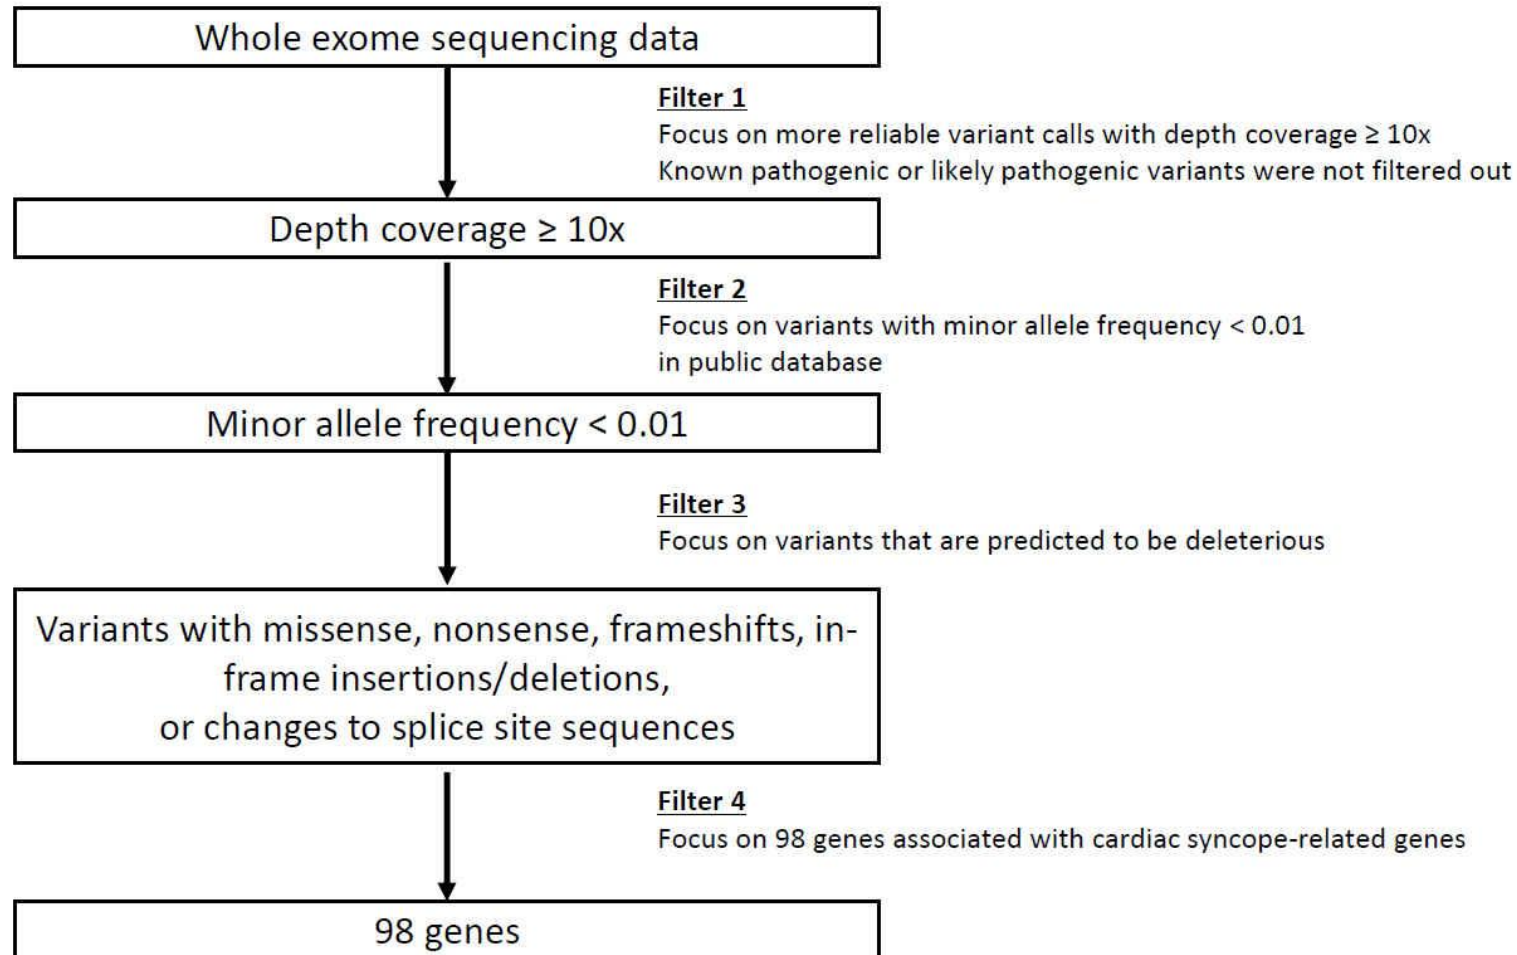

**Table S1** List of variant of uncertain significance with in-silico analysis for channelopathy genes

| Patient | Gene           | Refseq      | Nucleotide change  | Amino acid change  | Zyg | ACMG<br>classification* | gnomAD_ALL | gnomAD_EA | SIFT        | Polyphen2            |
|---------|----------------|-------------|--------------------|--------------------|-----|-------------------------|------------|-----------|-------------|----------------------|
| PT-007  | <i>ANK2</i>    | NM_001148.4 | c.10858T>A         | p.(Trp3620Arg)     | Het | VUS                     | 2.85.E-05  | 4.07.E-04 | Deleterious | Probably<br>damaging |
| PT-008  | <i>HCN4</i>    | NM_005477.2 | c.2845C>T          | p.(Arg949Trp)      | Het | VUS                     | 1.42.E-04  | 1.14.E-03 | Deleterious | Benign               |
| PT-008  | <i>TRPM4</i>   | NM_017636.3 | c.3304T>G          | p.(Ser1102Ala)     | Het | VUS                     | 5.72.E-05  | 8.14.E-04 | Tolerated   | Benign               |
| PT-010  | <i>ANK2</i>    | NM_001148.4 | c.11425A>G         | p.(Lys3809Glu)     | Het | VUS                     | 8.13.E-06  | 1.16.E-04 | Deleterious | Benign               |
| PT-010  | <i>TRPM4</i>   | NM_017636.3 | c.3008C>T          | p.(Pro1003Leu)     | Het | VUS                     | 2.85.E-05  | 2.90.E-04 | Tolerated   | Benign               |
| PT-011  | <i>SCN10A</i>  | NM_006514.2 | c.857C>T           | p.(Thr286Ile)      | Het | VUS                     | 1.10.E-04  | 1.51.E-03 | Deleterious | Benign               |
| PT-011  | <i>CACNA1C</i> | NM_000719.6 | c.5747A>G          | p.(Gln1916Arg)     | Het | VUS                     | 2.11.E-04  | 2.90.E-03 | Deleterious | Benign               |
| PT-014  | <i>RYR2</i>    | NM_001035.2 | c.5046A>C          | p.(Glu1682Asp)     | Het | VUS                     | 1.22.E-05  | 1.74.E-04 | Deleterious | Benign               |
| PT-014  | <i>ANK2</i>    | NM_001148.4 | c.8015A>C          | p.(Gln2672Pro)     | Het | VUS                     | 2.85.E-05  | 4.06.E-04 | Deleterious | Probably<br>damaging |
| PT-014  | <i>TRPM4</i>   | NM_017636.3 | c.1408A>T          | p.(Asn470Tyr)      | Het | VUS                     | N/A        | N/A       | Tolerated   | Benign               |
| PT-019  | <i>SCN10A</i>  | NM_006514.2 | c.3191C>T          | p.(Thr1064Met)     | Het | VUS                     | 1.23.E-05  | 0.00.E+00 | Deleterious | Benign               |
| PT-019  | <i>TRPM4</i>   | NM_017636.3 | c.2410G>A          | p.(Asp804Asn)      | Het | VUS                     | 4.65.E-05  | 6.36.E-04 | Deleterious | Probably<br>damaging |
| PT-026  | <i>AKAP9</i>   | NM_005751.4 | c.8189A>G          | p.(Gln2730Arg)     | Het | VUS                     | 8.95.E-05  | 1.22.E-03 | Tolerated   | Benign               |
| PT-027  | <i>AKAP9</i>   | NM_005751.4 | c.11714T>C         | p.(Met3905Thr)     | Het | VUS                     | 5.42.E-04  | 6.59.E-03 | Tolerated   | Benign               |
| PT-036  | <i>ANK2</i>    | NM_001148.4 | c.4A>G             | p.(Met2Val)        | Het | VUS                     | 6.46.E-05  | 0.00.E+00 | Deleterious | Benign               |
| PT-039  | <i>AKAP9</i>   | NM_005751.4 | c.3337A>T          | p.(Met1113Leu)     | Het | VUS                     | N/A        | N/A       | Tolerated   | Benign               |
| PT-049  | <i>SCN10A</i>  | NM_006514.2 | c.1234G>A          | p.(Glu412Lys)      | Het | VUS                     | N/A        | N/A       | Tolerated   | Probably<br>damaging |
| PT-049  | <i>AKAP9</i>   | NM_005751.4 | c.6184_6187delTTAG | p.(Leu2062Lysfs*3) | Het | VUS                     | N/A        | N/A       | N/A         | N/A                  |

|        |                |             |            |                |     |     |           |           |             |                      |
|--------|----------------|-------------|------------|----------------|-----|-----|-----------|-----------|-------------|----------------------|
| PT-057 | <i>SLMAP</i>   | NM_007159.2 | c.1174A>T  | p.(Ile392Phe)  | Het | VUS | 3.73.E-05 | 0.00.E+00 | Deleterious | Benign               |
| PT-061 | <i>AKAP9</i>   | NM_005751.4 | c.10406C>T | p.(Thr3469Met) | Het | VUS | 3.14.E-04 | 3.71.E-03 | Deleterious | Benign               |
| PT-061 | <i>ABCC9</i>   | NM_005691.3 | c.4604C>A  | p.(Ala1535Asp) | Het | VUS | 4.69.E-05 | 6.89.E-04 | Tolerated   | Benign               |
| PT-061 | <i>ABCC9</i>   | NM_005691.3 | c.4603G>A  | p.(Ala1535Thr) | Het | VUS | 7.22.E-05 | 7.43.E-04 | Tolerated   | Benign               |
| PT-061 | <i>TRPM4</i>   | NM_017636.3 | c.2410G>A  | p.(Asp804Asn)  | Het | VUS | 4.65.E-05 | 6.36.E-04 | Deleterious | Probably<br>damaging |
| PT-066 | <i>CACNA1C</i> | NM_000719.6 | c.1673C>T  | p.(Thr558Met)  | Het | VUS | 1.27.E-04 | 1.00.E-03 | Tolerated   | Possibly<br>damaging |
| PT-070 | <i>AKAP9</i>   | NM_005751.4 | c.119G>A   | p.(Arg40Lys)   | Het | VUS | 9.39.E-05 | 1.38.E-03 | Tolerated   | Benign               |
| PT-083 | <i>SCN4B</i>   | NM_174934.3 | c.231G>C   | p.(Lys77Asn)   | Het | VUS | 4.06.E-06 | 5.80.E-05 | Tolerated   | Benign               |
| PT-092 | <i>SNTA1</i>   | NM_003098.2 | c.1123G>A  | p.(Gly375Ser)  | Het | VUS | 2.86.E-05 | 2.33.E-04 | Deleterious | Probably<br>damaging |
| PT-104 | <i>SEMA3A</i>  | NM_006080.2 | c.2200C>T  | p.(Arg734Trp)  | Het | VUS | 2.44.E-05 | 1.74.E-04 | Deleterious | Probably<br>damaging |
| PT-105 | <i>SLMAP</i>   | NM_007159.2 | c.1174A>T  | p.(Ile392Phe)  | Het | VUS | 3.73.E-05 | 0.00.E+00 | Deleterious | Benign               |
| PT-108 | <i>RYR2</i>    | NM_001035.2 | c.4244A>G  | p.(Asp1415Gly) | Het | VUS | N/A       | N/A       | Tolerated   | Benign               |
| PT-113 | <i>ANK2</i>    | NM_001148.4 | c.9689C>T  | p.(Thr3230Met) | Het | VUS | 3.67.E-05 | 3.48.E-04 | Tolerated   | Benign               |
| PT-113 | <i>NUP155</i>  | NM_153485.2 | c.3038A>G  | p.(Asn1013Ser) | Het | VUS | 1.63.E-05 | 2.32.E-04 | Tolerated   | Benign               |
| PT-117 | <i>SLMAP</i>   | NM_007159.2 | c.1174A>T  | p.(Ile392Phe)  | Het | VUS | 3.73.E-05 | 0.00.E+00 | Deleterious | Benign               |
| PT-120 | <i>KCND2</i>   | NM_012281.2 | c.906G>T   | p.(Lys302Asn)  | Het | VUS | 6.52.E-05 | 5.90.E-05 | Deleterious | Probably<br>damaging |
| PT-121 | <i>CASQ2</i>   | NM_001232.3 | c.362G>A   | p.(Arg121His)  | Het | VUS | 2.44.E-05 | 0.00.E+00 | Tolerated   | Benign               |
| PT-122 | <i>SLMAP</i>   | NM_007159.2 | c.1174A>T  | p.(Ile392Phe)  | Het | VUS | 3.73.E-05 | 0.00.E+00 | Deleterious | Benign               |
| PT-134 | <i>CDH2</i>    | NM_001792.3 | c.1016G>A  | p.(Arg339Gln)  | Het | VUS | 3.98.E-06 | 0.00.E+00 | Deleterious | Probably<br>damaging |
| PT-141 | <i>SLMAP</i>   | NM_007159.2 | c.1174A>T  | p.(Ile392Phe)  | Het | VUS | 3.73.E-05 | 0.00.E+00 | Deleterious | Benign               |

gnomAD, Genome Aggregation Database; Het, heterozygous; N/A, not applicable; VUS, variant of uncertain significance; Zyg, zygosity.

\*Identified variants were classified according to the standards and guidelines by the American College of Medical Genetics and Genomics and the Association for Molecular Pathology [1].

**Table S2** List of variant of uncertain significance with in-silico analysis for cardiomyopathy genes

| Patient | Gene          | Refseq         | Nucleotide change | Amino acid change | Zyg | ACMG<br>classification* | gnomAD<br>_ALL | gnomAD<br>_EA | SIFT        | Polyphen2            |
|---------|---------------|----------------|-------------------|-------------------|-----|-------------------------|----------------|---------------|-------------|----------------------|
| PT-006  | <i>TTN</i>    | NM_133378.4    | c.20626C>T        | p.(Pro6876Ser)    | Het | VUS                     | 4.89.E-05      | 6.97.E-04     | Tolerated   | Benign               |
| PT-006  | <i>RBM20</i>  | NM_001134363.2 | c.137C>T          | p.(Pro46Leu)      | Het | VUS                     | N/A            | N/A           | Tolerated   | Benign               |
| PT-006  | <i>RBM20</i>  | NM_001134363.2 | c.226G>A          | p.(Val76Ile)      | Het | VUS                     | N/A            | N/A           | Tolerated   | Benign               |
| PT-007  | <i>TTN</i>    | NM_133378.4    | c.72151C>T        | p.(Arg24051Cys)   | Het | VUS                     | 3.66.E-05      | 1.16.E-04     | Deleterious | Benign               |
| PT-008  | <i>ACTN2</i>  | NM_001103.3    | c.2554C>T         | p.(Arg852Trp)     | Het | VUS                     | 4.07.E-06      | 0.00.E+00     | Deleterious | Probably<br>damaging |
| PT-008  | <i>TTN</i>    | NM_133378.4    | c.3409G>A         | p.(Gly1137Ser)    | Het | VUS                     | 2.44.E-05      | 1.16.E-04     | Deleterious | Probably<br>damaging |
| PT-008  | <i>CALR3</i>  | NM_145046.4    | c.377C>T          | p.(Ser126Leu)     | Het | VUS                     | 8.12.E-06      | 0.00.E+00     | Deleterious | Probably<br>damaging |
| PT-010  | <i>DSP</i>    | NM_004415.2    | c.7021G>C         | p.(Asp2341His)    | Het | VUS                     | N/A            | N/A           | Deleterious | Probably<br>damaging |
| PT-011  | <i>TTN</i>    | NM_133378.4    | c.63833G>A        | p.(Ser21278Asn)   | Het | VUS                     | 2.86.E-05      | 2.92.E-04     | Deleterious | Benign               |
| PT-011  | <i>TTN</i>    | NM_133378.4    | c.18280G>A        | p.(Asp6094Asn)    | Het | VUS                     | 2.05.E-05      | 2.94.E-04     | Deleterious | Benign               |
| PT-011  | <i>TTN</i>    | NM_133378.4    | c.5813T>C         | p.(Val1938Ala)    | Het | VUS                     | 3.25.E-05      | 2.90.E-04     | Tolerated   | Possibly<br>damaging |
| PT-011  | <i>PKP2</i>   | NM_004572.3    | c.131G>A          | p.(Ser44Asn)      | Het | VUS                     | 1.00.E-05      | 1.30.E-04     | Tolerated   | Benign               |
| PT-011  | <i>TMPO</i>   | NM_003276.2    | c.682_684delTCC   | p.(Ser228del)     | Het | VUS                     | N/A            | N/A           | N/A         | N/A                  |
| PT-012  | <i>MYBPC3</i> | NM_000256.3    | c.3316G>A         | p.(Asp1106Asn)    | Het | VUS                     | 2.69.E-05      | 1.86.E-04     | Deleterious | Probably<br>damaging |
| PT-022  | <i>TTN</i>    | NM_133378.4    | c.35586A>C        | p.(Glu11862Asp)   | Het | VUS                     | 6.55.E-05      | 9.30.E-04     | Deleterious | Probably<br>damaging |

|        |             |                |                        |                   |     |     |           |           |             |                      |
|--------|-------------|----------------|------------------------|-------------------|-----|-----|-----------|-----------|-------------|----------------------|
| PT-026 | <i>TTN</i>  | NM_133378.4    | c.82655T>A             | p.(Ile27552Asn)   | Het | VUS | 2.04.E-05 | 2.92.E-04 | Deleterious | Possibly<br>damaging |
| PT-026 | <i>JUP</i>  | NM_002230.2    | c.427G>A               | p.(Ala143Thr)     | Het | VUS | 9.51.E-05 | 2.33.E-04 | Deleterious | Probably<br>damaging |
| PT-027 | <i>TTN</i>  | NM_133378.4    | c.82655T>A             | p.(Ile27552Asn)   | Het | VUS | 2.04.E-05 | 2.92.E-04 | Deleterious | Possibly<br>damaging |
| PT-027 | <i>TTN</i>  | NM_133378.4    | c.40274C>A             | p.(Thr13425Asn)   | Het | VUS | 4.91.E-05 | 2.92.E-04 | Tolerated   | Benign               |
| PT-032 | <i>TTN</i>  | NM_133378.4    | c.86341C>T             | p.(Arg28781Cys)   | Het | VUS | 8.96.E-05 | 1.16.E-04 | Deleterious | Probably<br>damaging |
| PT-032 | <i>TTN</i>  | NM_133378.4    | c.17425A>C             | p.(Thr5809Pro)    | Het | VUS | 6.97.E-05 | 1.17.E-04 | Tolerated   | Possibly<br>damaging |
| PT-036 | <i>TTN</i>  | NM_133378.4    | c.97702C>T             | p.(Arg32568Trp)   | Het | VUS | 4.88.E-05 | 6.38.E-04 | Deleterious | Probably<br>damaging |
| PT-043 | <i>TTN</i>  | NM_133378.4    | c.24124G>T             | p.(Val8042Phe)    | Het | VUS | 2.90.E-05 | 3.49.E-04 | Deleterious | Possibly<br>damaging |
| PT-043 | <i>TTN</i>  | NM_133378.4    | c.15583G>A             | p.(Val5195Met)    | Het | VUS | 1.23.E-05 | 5.84.E-05 | Tolerated   | Possibly<br>damaging |
| PT-049 | <i>NEXN</i> | NM_144573.3    | c.1688_1691dupGTA<br>G | p.(Ser564Argfs*2) | Het | VUS | N/A       | N/A       | N/A         | N/A                  |
| PT-051 | <i>TTN</i>  | NM_133378.4    | c.12526G>A             | p.(Asp4176Asn)    | Het | VUS | 4.08.E-06 | 5.85.E-05 | Tolerated   | Benign               |
| PT-051 | <i>FLNC</i> | NM_001458.4    | c.5278G>A              | p.(Gly1760Ser)    | Het | VUS | 1.85.E-04 | 6.72.E-04 | Tolerated   | Benign               |
| PT-051 | <i>FKTN</i> | NM_001079802.1 | c.1182T>G              | p.(Phe394Leu)     | Het | VUS | 4.06.E-06 | 5.80.E-05 | Deleterious | Probably<br>damaging |
| PT-056 | <i>TTN</i>  | NM_133378.4    | c.48430C>T             | p.(Pro16144Ser)   | Het | VUS | 1.23.E-05 | 1.76.E-04 | Deleterious | Probably<br>damaging |
| PT-056 | <i>PKP2</i> | NM_004572.3    | c.473G>A               | p.(Arg158Lys)     | Het | VUS | 6.50.E-05 | 9.28.E-04 | Tolerated   | Benign               |

|        |               |                |            |                 |     |     |           |           |             |                      |
|--------|---------------|----------------|------------|-----------------|-----|-----|-----------|-----------|-------------|----------------------|
| PT-056 | <i>MYH6</i>   | NM_002471.3    | c.2306C>T  | p.(Ala769Val)   | Het | VUS | 5.70.E-05 | 7.54.E-04 | Deleterious | Possibly<br>damaging |
| PT-057 | <i>ACTN2</i>  | NM_001103.3    | c.1081A>G  | p.(Met361Val)   | Het | VUS | 2.44.E-05 | 2.32.E-04 | Tolerated   | Benign               |
| PT-064 | <i>TTN</i>    | NM_133378.4    | c.90778A>G | p.(Ile30260Val) | Het | VUS | 4.07.E-05 | 5.80.E-04 | Tolerated   | Benign               |
| PT-064 | <i>DSP</i>    | NM_004415.2    | c.4886G>T  | p.(Ser1629Ile)  | Het | VUS | 5.32.E-05 | 7.56.E-04 | Deleterious | Benign               |
| PT-064 | <i>MYH6</i>   | NM_002471.3    | c.3520C>T  | p.(Gln1174*)    | Het | VUS | 1.35.E-05 | 1.19.E-04 | N/A         | N/A                  |
| PT-066 | <i>TTN</i>    | NM_133378.4    | c.40036G>C | p.(Val13346Leu) | Het | VUS | 5.74.E-05 | 8.09.E-04 | Deleterious | Benign               |
| PT-068 | <i>TTN</i>    | NM_133378.4    | c.57212G>A | p.(Arg19071Gln) | Het | VUS | 2.85.E-05 | 5.81.E-05 | Deleterious | Probably<br>damaging |
| PT-072 | <i>TTN</i>    | NM_133378.4    | c.47705C>T | p.(Ala15902Val) | Het | VUS | 4.26.E-06 | 6.09.E-05 | Tolerated   | Benign               |
| PT-072 | <i>DSP</i>    | NM_004415.2    | c.2540C>G  | p.(Pro847Arg)   | Het | VUS | 3.66.E-05 | 5.22.E-04 | Tolerated   | Benign               |
| PT-075 | <i>FKTN</i>   | NM_001079802.1 | c.49A>C    | p.(Ser17Arg)    | Het | VUS | 1.63.E-05 | 2.32.E-04 | Deleterious | Probably<br>damaging |
| PT-075 | <i>MYBPC3</i> | NM_000256.3    | c.2807C>T  | p.(Thr936Met)   | Het | VUS | 4.08.E-05 | 0.00.E+00 | Deleterious | Probably<br>damaging |
| PT-077 | <i>PRDM16</i> | NM_022114.3    | c.43G>A    | p.(Gly15Ser)    | Het | VUS | 2.89.E-05 | 1.75.E-04 | Tolerated   | Benign               |
| PT-077 | <i>TTN</i>    | NM_133378.4    | c.34406A>T | p.(Gln11469Leu) | Het | VUS | N/A       | N/A       | Deleterious | Probably<br>damaging |
| PT-080 | <i>PRDM16</i> | NM_022114.3    | c.1726G>A  | p.(Glu576Lys)   | Het | VUS | 1.47.E-04 | 9.86.E-04 | Tolerated   | Benign               |
| PT-080 | <i>TECRL</i>  | NM_001010874.4 | c.308G>A   | p.(Arg103Gln)   | Het | VUS | 8.16.E-06 | 1.16.E-04 | Deleterious | Probably<br>damaging |
| PT-080 | <i>MYBPC3</i> | NM_000256.3    | c.3137C>T  | p.(Thr1046Met)  | Het | VUS | 6.26.E-05 | 6.96.E-04 | Tolerated   | Benign               |
| PT-083 | <i>TTN</i>    | NM_133378.4    | c.26873C>T | p.(Pro8958Leu)  | Het | VUS | 1.25.E-05 | 1.79.E-04 | Deleterious | Probably<br>damaging |
| PT-085 | <i>TTN</i>    | NM_133378.4    | c.28055T>C | p.(Val9352Ala)  | Het | VUS | 2.44.E-05 | 2.32.E-04 | Tolerated   | Benign               |
| PT-085 | <i>MYH6</i>   | NM_002471.3    | c.2384G>A  | p.(Arg795Gln)   | Het | VUS | 4.47.E-05 | 1.16.E-04 | Tolerated   | Probably             |

|        |               |             |                                 |                        |     |     |           |           |             |                      |          |
|--------|---------------|-------------|---------------------------------|------------------------|-----|-----|-----------|-----------|-------------|----------------------|----------|
|        |               |             |                                 |                        |     |     |           |           |             |                      | damaging |
| PT-091 | <i>TTN</i>    | NM_133378.4 | c.80702C>T                      | p.(Ala26901Val)        | Het | VUS | 9.38.E-05 | 5.84.E-04 | Tolerated   | Benign               |          |
| PT-091 | <i>TTN</i>    | NM_133378.4 | c.41663G>A                      | p.(Arg13888His)        | Het | VUS | 4.98.E-05 | 1.17.E-04 | Deleterious | Possibly<br>damaging |          |
| PT-092 | <i>PRDM16</i> | NM_022114.3 | c.1453T>C                       | p.(Phe485Leu)          | Het | VUS | 4.08.E-06 | 5.80.E-05 | Tolerated   | Possibly<br>damaging |          |
| PT-092 | <i>FLNC</i>   | NM_001458.4 | c.1310G>T                       | p.(Arg437Leu)          | Het | VUS | 1.22.E-05 | 1.74.E-04 | Tolerated   | Benign               |          |
| PT-094 | <i>TTN</i>    | NM_133378.4 | c.2581G>A                       | p.(Ala861Thr)          | Het | VUS | N/A       | N/A       | Deleterious | Benign               |          |
| PT-094 | <i>GATAD1</i> | NM_021167.4 | c.117_131delGGGCA<br>GCGGGGGCGC | p.(Gly40_Ala44del<br>) | Het | VUS | 9.08.E-05 | 0.00.E+00 | N/A         | N/A                  |          |
| PT-094 | <i>DMD</i>    | NM_004006.2 | c.981C>G                        | p.(Asp327Glu)          | Het | VUS | N/A       | N/A       | Tolerated   | Benign               |          |
| PT-095 | <i>TTN</i>    | NM_133378.4 | c.21913C>T                      | p.(Pro7305Ser)         | Het | VUS | 3.73.E-05 | 5.19.E-04 | Deleterious | Probably<br>damaging |          |
| PT-100 | <i>TTN</i>    | NM_133378.4 | c.40036G>C                      | p.(Val13346Leu)        | Het | VUS | 5.74.E-05 | 8.09.E-04 | Deleterious | Benign               |          |
| PT-100 | <i>MYBPC3</i> | NM_000256.3 | c.3750C>G                       | p.(Ile1250Met)         | Het | VUS | 1.22.E-05 | 1.74.E-04 | Deleterious | Benign               |          |
| PT-104 | <i>TTN</i>    | NM_133378.4 | c.160G>A                        | p.(Val54Met)           | Het | VUS | 4.06.E-05 | 5.81.E-04 | Deleterious | Benign               |          |
| PT-105 | <i>TTN</i>    | NM_133378.4 | c.23102T>C                      | p.(Met7701Thr)         | Het | VUS | N/A       | N/A       | Deleterious | Benign               |          |
| PT-113 | <i>TTN</i>    | NM_133378.4 | c.36285G>T                      | p.(Lys12095Asn)        | Het | VUS | 1.22.E-05 | 1.76.E-04 | Deleterious | Benign               |          |
| PT-117 | <i>TTN</i>    | NM_133378.4 | c.23129C>T                      | p.(Pro7710Leu)         | Het | VUS | 4.17.E-06 | 5.96.E-05 | Deleterious | Probably<br>damaging |          |
| PT-117 | <i>TTN</i>    | NM_133378.4 | c.19280C>G                      | p.(Ala6427Gly)         | Het | VUS | 4.08.E-06 | 5.80.E-05 | Tolerated   | Benign               |          |
| PT-117 | <i>TTN</i>    | NM_133378.4 | c.16832G>C                      | p.(Arg5611Thr)         | Het | VUS | N/A       | N/A       | Tolerated   | Benign               |          |
| PT-117 | <i>MYH6</i>   | NM_002471.3 | c.1885G>A                       | p.(Asp629Asn)          | Het | VUS | 8.18.E-05 | 8.70.E-04 | Tolerated   | Possibly<br>damaging |          |
| PT-118 | <i>LAMA4</i>  | NM_002290.4 | c.572G>A                        | p.(Gly191Glu)          | Het | VUS | 3.26.E-05 | 4.66.E-04 | Deleterious | Probably<br>damaging |          |

|        |              |             |            |                 |     |     |           |           |             |                      |
|--------|--------------|-------------|------------|-----------------|-----|-----|-----------|-----------|-------------|----------------------|
| PT-122 | <i>TTN</i>   | NM_133378.4 | c.91447G>A | p.(Glu30483Lys) | Het | VUS | 2.03.E-05 | 2.90.E-04 | Tolerated   | Benign               |
| PT-122 | <i>PSEN1</i> | NM_000021.3 | c.367G>A   | p.(Glu123Lys)   | Het | VUS | 8.12.E-06 | 5.80.E-05 | Tolerated   | Benign               |
| PT-130 | <i>LAMA4</i> | NM_002290.4 | c.1852A>G  | p.(Asn618Asp)   | Het | VUS | 3.25.E-05 | 4.64.E-04 | Deleterious | Possibly<br>damaging |
| PT-130 | <i>MYH6</i>  | NM_002471.3 | c.404A>G   | p.(Asn135Ser)   | Het | VUS | 1.62.E-05 | 5.80.E-05 | Tolerated   | Benign               |
| PT-133 | <i>TTN</i>   | NM_133378.4 | c.29432C>T | p.(Pro9811Leu)  | Het | VUS | 2.93.E-05 | 2.43.E-04 | Deleterious | Benign               |
| PT-134 | <i>BAG3</i>  | NM_004281.3 | c.1015A>G  | p.(Ile339Val)   | Het | VUS | 4.06.E-06 | 5.80.E-05 | Deleterious | Probably<br>damaging |

---

gnomAD, Genome Aggregation Database; Het, heterozygous; N/A, not applicable; VUS, variant of uncertain significance; Zyg, zygosity.

\*Identified variants were classified according to the standards and guidelines by the American College of Medical Genetics and Genomics and the Association for Molecular Pathology [1].

**Table S3** List of variant of uncertain significance with in-silico analysis for primary pulmonary hypertension genes

| Patient | Gene         | Refseq      | Nucleotide<br>change | Amino acid<br>change | Zyg | Interpretation | gnomAD_ALL | gnomAD_EA | SIFT      | Polyphen2         |
|---------|--------------|-------------|----------------------|----------------------|-----|----------------|------------|-----------|-----------|-------------------|
| PT-001  | <i>BMPR2</i> | NM_001204.6 | c.1430A>G            | p.(Lys477Arg)        | Het | VUS            | N/A        | N/A       | Tolerated | Probably damaging |
| PT-006  | <i>BMPR2</i> | NM_001204.6 | c.276A>C             | p.(Gln92His)         | Het | VUS            | 5.69.E-05  | 7.54.E-04 | Tolerated | Benign            |

gnomAD, Genome Aggregation Database; Het, heterozygous; N/A, not applicable; VUS, variant of uncertain significance; Zyg, zygosity.

\*Identified variants were classified according to the standards and guidelines by the American College of Medical Genetics and Genomics and the Association for Molecular Pathology [1].

## REFERENCE

1. Richards S, Aziz N, Bale S, Bick D, Das S, Gastier-Foster J, et al. Standards and guidelines for the interpretation of sequence variants: a joint consensus recommendation of the American College of Medical Genetics and Genomics and the Association for Molecular Pathology. Genet Med 2015;17:405-24.
